# Supplementary material
Source: Research Square preprint supplement (doi:10.21203/rs.3.rs-9462327/v1)
Supplement: Supplementary file 1 [file 467ff1f9f79dae65a24f4dd8.docx]

**Supplementary table 1.** Definition of comorbidities

| **Disease** | **ICD-10 code** | **Definition** |
| --- | --- | --- |
| **Cardiovascular disease** |  |  |
| Hypertension | I10-I15 | Main sick and 1st sub sick |
| Congestive heart failure | I43, I50, I099, I110, I130, I132, I255, I420, I425, I426, I427, I428, I429, P290 | Main sick and 1st sub sick |
| Coronary heart disease | I20-I25 | Main sick and 1st sub sick |
| Myocardial infarction | I21, I22, I252 | Main sick and 1st sub sick |
| **Chronic respiratory disease** |  |  |
| Lung cancer | C33-34 | Main sick and 1st sub sick |
| Bronchiectasis | J47 | Main sick and 1st sub sick |
| Pulmonary tuberculosis | A15, A16, B909 | Main sick and 1st sub sick |
| **Metabolic disease** |  |  |
| Diabetes | E100 – E149 | Main sick and 1st sub sick |
| Liver disease | B18, K73, K74, K700-K704, K709, K711, K713-K715, K717, K721, K729,K760, K762-K769, I850, I859, I864, I982, Z944 | Main sick and 1st sub sick |
| **Multiple organ loss of tissue** |  |  |
| Osteoporosis | M81 | Main sick and 1st sub sick |
| Renal disease | N18-N19, N052-N057, N250, I120, I131, N032-N037, Z490-Z492, Z940, Z992 | Main sick and 1st sub sick |
| Anemia | D50-D59, D61-D64 | Main sick and 1st sub sick |
| **Mental cluster** |  |  |
| Dementia (Cognitive impairment) | F00-F03, G30, F051, G311 | Main sick and 1st sub sick |
| Depression | F32, F33 | Main sick and 1st sub sick |

**Supplementary table 2.** Prevalence ratio of comorbidity by COPD and smoking status

|  | **Overall**  **PR (95% CI)** | **40 – 49**  **PR (95% CI)** | **50 – 59**  **PR (95% CI)** | **60 – 69**  **PR (95% CI)** | **70 – 79**  **PR (95% CI)** | **Over 80**  **PR (95% CI)** |
| --- | --- | --- | --- | --- | --- | --- |
| **Cardiovascular disease** |  |  |  |  |  |  |
| **Hypertension** |  |  |  |  |  |  |
| Never smoker | 1.23 (1.21, 1.25) | 1.56 (1.36, 1.80) | 1.37 (1.29, 1.45) | 1.24 (1.20, 1.28) | 1.21 (1.18, 1.24) | 1.22 (1.18, 1.26) |
| Past smoker | 1.22 (1.19, 1.24) | 1.51 (1.31, 1.74) | 1.32 (1.24, 1.41) | 1.22 (1.18, 1.26) | 1.17 (1.13, 1.21) | 1.18 (1.11, 1.25) |
| Current smoker | 1.28 (1.25, 1.32) | 1.71 (1.47, 1.99) | 1.45 (1.35, 1.56) | 1.24 (1.18, 1.29) | 1.17 (1.11, 1.24) | 1.23 (1.08, 1.39) |
| **Congestive heart failure** |  |  |  |  |  |  |
| Never smoker | 1.62 (1.57, 1.66) | 1.35 (0.99, 1.85) | 1.51 (1.32, 1.72) | 1.58 (1.47, 1.69) | 1.62 (1.55, 1.69) | 1.67 (1.59, 1.75) |
| Past smoker | 1.53 (1.47, 1.59) | 1.20 (0.87, 1.64) | 1.49 (1.29, 1.73) | 1.38 (1.28, 1.49) | 1.61 (1.52, 1.72) | 1.59 (1.45, 1.74) |
| Current smoker | 1.67 (1.56, 1.79) | 2.47 (1.65, 3.77) | 1.73 (1.45, 2.07) | 1.56 (1.40, 1.74) | 1.62 (1.44, 1.83) | 1.91 (1.51, 2.42) |
| **Coronary heart disease** |  |  |  |  |  |  |
| Never smoker | 1.20 (1.18, 1.23) | 1.36 (1.11, 1.68) | 1.11 (1.02, 1.21) | 1.21 (1.15, 1.26) | 1.18 (1.14, 1.22) | 1.25 (1.19, 1.30) |
| Past smoker | 1.19 (1.17, 1.22) | 1.46 (1.20, 1.78) | 1.09 (1.01, 1.19) | 1.16 (1.11, 1.21) | 1.20 (1.15, 1.25) | 1.23 (1.14, 1.31) |
| Current smoker | 1.39 (1.34, 1.45) | 1.80 (1.43, 2.28) | 1.49 (1.35, 1.64) | 1.38 (1.30, 1.46) | 1.29 (1.20, 1.38) | 1.32 (1.13, 1.56) |
| **Chronic respiratory disease** |  |  |  |  |  |  |
| **Lung cancer** |  |  |  |  |  |  |
| Never smoker | 2.16 (2.03, 2.31) | 1.76 (1.19, 2.63) | 1.51 (1.21, 1.89) | 2.33 (2.07, 2.63) | 2.22 (2.01, 2.45) | 2.03 (1.72, 2.39) |
| Past smoker | 2.31 (2.17, 2.45) | 2.75 (1.36, 6.03) | 2.14 (1.74, 2.65) | 2.31 (2.10, 2.56) | 2.25 (2.05, 2.46) | 2.29 (1.90, 2.77) |
| Current smoker | 2.65 (2.22, 3.17) | 2.64 (0.92, 8.58) | 1.78 (1.09, 2.96) | 3.16 (2.40, 4.23) | 2.46 (1.84, 3.33) | 2.09 (1.15, 4.03) |
| **Bronchiectasis** |  |  |  |  |  |  |
| Never smoker | 4.22 (4.05, 4.40) | 5.46 (4.27, 7.08) | 4.99 (4.51, 5.53) | 4.49 (4.19, 4.81) | 3.64 (3.40, 3.90) | 3.26 (2.91, 3.66) |
| Past smoker | 3.62 (3.41, 3.84) | 3.51 (2.55, 4.94) | 4.89 (4.15, 5.78) | 3.70 (3.37, 4.07) | 3.05 (2.76, 3.36) | 3.57 (2.92, 4.40) |
| Current smoker | 3.83 (3.44, 4.27) | 4.66 (2.90, 7.80) | 4.35 (3.49, 5.48) | 3.65 (3.12, 4.28) | 3.46 (2.78, 4.34) | 3.34 (3.03, 3.68) |
| **Pulmonary tuberculosis** |  |  |  |  |  |  |
| Never smoker | 3.06 (2.90, 3.23) | 3.81 (2.92, 5.03) | 3.65 (3.12, 4.28) | 3.60 (3.22, 4.02) | 2.85 (2.60, 3.13) | 2.26 (2.01, 2.55) |
| Past smoker | 2.82 (2.64, 3.02) | 4.19 (3.00, 5.99) | 3.10 (2.62, 3.69) | 3.07 (2.74, 3.44) | 2.65 (2.37, 2.97) | 1.99 (1.66, 2.39) |
| Current smoker | 3.23 (2.91, 3.60) | 3.53 (2.42, 5.25) | 2.94 (2.42, 3.59) | 3.45 (2.92, 4.09) | 3.06 (2.43, 3.90) | 3.33 (1.90, 6.26) |
| **Metabolic disease** |  |  |  |  |  |  |
| **Diabetes** |  |  |  |  |  |  |
| Never smoker | 0.95 (0.94, 0.97) | 1.15 (1.01, 1.30) | 0.99 (0.94, 1.05) | 0.95 (0.92, 0.98) | 0.92 (0.90, 0.95) | 0.94 (0.91, 0.98) |
| Past smoker | 0.96 (0.94, 0.98) | 1.05 (0.92, 1.19) | 1.01 (0.96, 1.08) | 0.96 (0.93, 1.00) | 0.91 (0.88, 0.94) | 0.92 (0.87, 0.98) |
| Current smoker | 1.02 (0.99, 1.05) | 1.20 (1.05, 1.38) | 1.15 (1.07, 1.22) | 0.98 (0.94, 1.03) | 0.94 (0.89, 0.99) | 0.92 (0.80, 1.05) |
| **Liver disease** |  |  |  |  |  |  |
| Never smoker | 1.01 (0.99, 1.03) | 1.03 (0.94, 1.14) | 0.98 (0.92, 1.03) | 0.98 (0.94, 1.02) | 1.00 (0.97, 1.04) | 1.06 (0.99, 1.12) |
| Past smoker | 1.03 (1.01, 1.06) | 1.07 (0.96, 1.19) | 1.00 (0.94, 1.07) | 1.03 (0.99, 1.07) | 1.01 (0.96, 1.05) | 1.06 (0.97, 1.17) |
| Current smoker | 1.14 (1.10, 1.18) | 1.10 (0.99, 1.24) | 1.13 (1.05, 1.21) | 1.15 (1.08, 1.21) | 1.14 (1.05, 1.23) | 1.12 (0.90, 1.39) |
| **Multiple organ loss of tissue** |  |  |  |  |  |  |
| **Osteoporosis** |  |  |  |  |  |  |
| Never smoker | 1.12 (1.10, 1.14) | 1.05 (0.83, 1.33) | 1.11 (1.03, 1.19) | 1.11 (1.07, 1.16) | 1.07 (1.04, 1.10) | 1.08 (1.03, 1.12) |
| Past smoker | 1.17 (1.11, 1.22) | 1.38 (0.83, 2.32) | 1.24 (1.02, 1.52) | 1.08 (0.98, 1.20) | 1.17 (1.09, 1.25) | 1.12 (1.01, 1.25) |
| Current smoker | 1.28 (1.19, 1.38) | 0.95 (0.56, 1.60) | 1.13 (0.92, 1.40) | 1.21 (1.06, 1.38) | 1.32 (1.17, 1.49) | 1.26 (1.02, 1.57) |
| **Renal disease** |  |  |  |  |  |  |
| Never smoker | 1.00 (0.93, 1.07) | 1.08 (0.67, 1.74) | 0.80 (0.61, 1.04) | 0.89 (0.76, 1.03) | 1.05 (0.94, 1.17) | 1.06 (0.91, 1.23) |
| Past smoker | 1.16 (1.00, 1.36) | 1.21 (0.53, 2.81) | 1.08 (0.75, 1.57) | 1.08 (0.84, 1.38) | 1.20 (0.92, 1.57) | 1.46 (0.91, 2.39) |
| Current smoker | 1.16 (1.00, 1.36) | 1.21 (0.53, 2.81) | 1.08 (0.75, 1.57) | 1.08 (0.84, 1.38) | 1.20 (0.92, 1.57) | 1.46 (0.91, 2.39) |
| **Anemia** |  |  |  |  |  |  |
| Never smoker | 1.00 (0.97, 1.04) | 0.97 (0.86, 1.11) | 0.92 (0.84, 1.02) | 1.02 (0.95, 1.10) | 1.05 (1.00, 1.11) | 0.97 (0.91, 1.04) |
| Past smoker | 1.03 (0.98, 1.07) | 0.90 (0.71, 1.15) | 0.97 (0.84, 1.13) | 1.02 (0.94, 1.11) | 1.04 (0.97, 1.12) | 1.05 (0.93, 1.18) |
| Current smoker | 1.17 (1.08, 1.26) | 1.30 (0.99, 1.71) | 1.13 (0.94, 1.35) | 1.06 (0.94, 1.20) | 1.35 (1.17, 1.57) | 0.93 (0.71, 1.23) |
| **Mental cluster** |  |  |  |  |  |  |
| **Dementia (Cognitive impairment)** |  |  |  |  |  |  |
| Never smoker | 1.04 (1.01, 1.07) | 1.06 (0.51, 2.26) | 0.92 (0.74, 1.15) | 1.09 (1.01, 1.19) | 1.08 (1.03, 1.12) | 1.00 (0.96, 1.04) |
| Past smoker | 1.06 (1.01, 1.11) | 0.55 (0.11, 2.13) | 0.92 (0.74, 1.15) | 1.03 (0.92, 1.17) | 1.05 (0.98, 1.12) | 1.06 (0.97, 1.15) |
| Current smoker | 1.10 (1.01, 1.20) | 0.62 (0.15, 2.48) | 1.60 (1.07, 2.44) | 1.06 (0.89, 1.25) | 1.09 (0.96, 1.24) | 1.00 (0.83, 1.20) |
| **Depression** |  |  |  |  |  |  |
| Never smoker | 1.19 (1.12, 1.27) | 1.57 (0.99, 2.55) | 1.13 (0.83, 1.57) | 1.36 (1.16, 1.59) | 1.19 (1.09, 1.31) | 1.13 (1.03, 1.24) |
| Past smoker | 1.17 (1.06, 1.29) | 1.11 (0.45, 2.80) | 1.41 (0.94, 2.15) | 1.49 (1.22, 1.83) | 1.05 (0.91, 1.22) | 1.04 (0.85, 1.27) |
| Current smoker | 1.19 (1.14, 1.25) | 1.13 (0.44, 3.00) | 1.36 (0.87, 2.16) | 1.32 (0.98, 1.79) | 1.33 (1.02, 1.75) | 0.92 (0.60, 1.41) |

CI, confidence interval; PR, prevalence ratio

Adjusted for age, sex, residential area, income level, residential area, BMI (continuous), drinking and smoking status.

**Supplementary table 3.** All-cause mortality by comorbidities in COPD patients and smoking status

|  | **Overall**  **HR (95% CI)** | **40 – 49**  **HR (95% CI)** | **50 – 59**  **HR (95% CI)** | **60 – 69**  **HR (95% CI)** | **70 – 79**  **HR (95% CI)** | **≥80**  **HR (95% CI)** |
| --- | --- | --- | --- | --- | --- | --- |
| **Cardiovascular disease** |  |  |  |  |  |  |
| **Hypertension** |  |  |  |  |  |  |
| Never smoker | 1.25 (1.21, 1.29) | 2.01 (1.08, 3.76) | 1.19 (0.93, 1.53) | 1.29 (1.17, 1.42) | 1.20 (1.14, 1.27) | 1.26 (1.20, 1.33) |
| Past smoker | 1.18 (1.13, 1.22) | 2 81 (1.55, 5.11) | 1.32 (1.06, 1.65) | 1.31 (1.20, 1.43) | 1.13 (1.07, 1.20) | 1.13 (1.05, 1.22) |
| Current smoker | 1.26 (1.19, 1.33) | 2.04 (1.15, 3.61) | 1.17 (0.96, 1.43) | 1.40 (1.28, 1.54) | 1.20 (1.10, 1.31) | 1.16 (1.01, 1.32) |
| **Congestive heart failure** |  |  |  |  |  |  |
| Never smoker | 1.58 (1.51, 1.65) | 3.78 (1.52, 9.40) | 2.25 (1.58, 3.21) | 2.22 (1.94, 2.54) | 1.37 (1.28, 1.46) | 1.65 (1.54, 1.78) |
| Past smoker | 1.42 (1.34, 1.50) | 4.67 (2.01, 10.86) | 1.72 (1.21, 2.44) | 1.70 (1.48, 1.96) | 1.43 (1.31, 1.55) | 1.23 (1.11, 1.37) |
| Current smoker | 1.60 (1.47, 1.75) | 1.51 (0.47, 4.87) | 1.69 (1.19, 2.39) | 1.82 (1.55, 2.15) | 1.44 (1.26, 1.66) | 1.62 (1.33, 1.96) |
| **Coronary heart disease** |  |  |  |  |  |  |
| Never smoker | 1.21 (1.16, 1.26) | 0.42 (0.10, 1.72) | 1.52 (1.11, 2.08) | 1.41 (1.25, 1.58) | 1.12 (1.05, 1.19) | 1.24 (1.16, 1.33) |
| Past smoker | 1.13 (1.08, 1.18) | 1 49 (0.64, 3.50) | 1.13 (0.85, 1.49) | 1.16 (1.04, 1.28) | 1.12 (1.05, 1.20) | 1.10 (1.01, 1.20) |
| Current smoker | 1.18 (1.10, 1.26) | 2.84 (1.54, 5.22) | 1.00 (0.76, 1.31) | 1.29 (1.15, 1.45) | 1.13 (1.02, 1.25) | 1.12 (0.95, 1.33) |
| **Chronic respiratory disease** |  |  |  |  |  |  |
| **Lung cancer** |  |  |  |  |  |  |
| Never smoker | 2.91 (2.70, 3.14) | 25.74 (12.00, 55.22) | 7.35 (5.02, 10.75) | 3.81 (3.27, 4.44) | 2.23 (1.91, 2.59) | 2.81 (2.51, 3.14) |
| Past smoker | 3.24 (3.05, 3.43) | 16.77 (6.79, 41.41) | 7.19 (5.51, 9.37) | 4.19 (3.75, 4.67) | 2.93 (2.70, 3.19) | 2.43 (2.09, 2.83) |
| Current smoker | 2.93 (2.50, 3.43) |  | 2.81 (1.45, 5.44) | 3.51 (2.72, 4.53) | 2.84 (2.23, 3.63) | 2.31 (1.52, 3.51) |
| **Bronchiectasis** |  |  |  |  |  |  |
| Never smoker | 1.05 (0.99, 1.13) | 1.67 (0.84, 3.33) | 1.31 (1.00, 1.72) | 1.07 (0.93, 1.23) | 0.91 (0.80, 1.03) | 1.15 (1.04, 1.27) |
| Past smoker | 0.99 (0.91, 1.07) | 1 41 (0.60, 3.28) | 0.75 (0.50, 1.11) | 0.99 (0.85, 1.16) | 0.99 (0.88, 1.12) | 1.05 (0.88, 1.24) |
| Current smoker | 0.94 (0.82, 1.08) | 1.41 (0.35, 5.80) | 1.14 (0.76, 1.70) | 0.83 (0.65, 1.06) | 0.95 (0.75, 1.19) | 1.16 (0.80, 1.66) |
| **Pulmonary tuberculosis** |  |  |  |  |  |  |
| Never smoker | 1.37 (1.27, 1.47) | 1.24 (0.59, 2.60) | 2.65 (2.01, 3.50) | 1.46 (1.23, 1.73) | 1.15 (1.01, 1.31) | 1.36 (1.21, 1.53) |
| Past smoker | 1.36 (1.26, 1.48) | 2 87 (1.58, 5.22) | 1.41 (1.05, 1.91) | 1.32 (1.13, 1.55) | 1.47 (1.31, 1.64) | 1.08 (0.91, 1.29) |
| Current smoker | 1.38 (1.22, 1.56) | 1.15 (0.48, 2.75) | 1.41 (1.05, 1.90) | 1.61 (1.33, 1.95) | 1.12 (0.89, 1.41) | 0.99 (0.63, 1.54) |
| **Metabolic disease** |  |  |  |  |  |  |
| **Diabetes** |  |  |  |  |  |  |
| Never smoker | 1.33 (1.28, 1.37) | 3.21 (1.90, 5.43) | 1.65 (1.31, 2.07) | 1.49 (1.35, 1.64) | 1.21 (1.14, 1.28) | 1.38 (1.31, 1.46) |
| Past smoker | 1.37 (1.32, 1.42) | 2 05 (1.11, 3.78) | 1.66 (1.36, 2.03) | 1.51 (1.39, 1.64) | 1.37 (1.30, 1.45) | 1.19 (1.10, 1.29) |
| Current smoker | 1.46 (1.38, 1.54) | 3.27 (2.01, 5.33) | 1.97 (1.68, 2.32) | 1.52 (1.38, 1.66) | 1.38 (1.27, 1.50) | 1.17 (1.01, 1.36) |
| **Liver disease** |  |  |  |  |  |  |
| Never smoker | 1.25 (1.19, 1.31) | 3.81 (2.45, 5.92) | 1.23 (0.97, 1.57) | 1.43 (1.28, 1.60) | 1.14 (1.04, 1.24) | 1.24 (1.15, 1.34) |
| Past smoker | 1.25 (1.19, 1.32) | 2 69 (1.66, 4.36) | 1.34 (1.08, 1.66) | 1.36 (1.23, 1.50) | 1.21 (1.12, 1.31) | 1.11 (0.98, 1.26) |
| Current smoker | 1.37 (1.28, 1.46) | 2.55 (1.61, 4.02) | 1.71 (1.45, 2.03) | 1.41 (1.27, 1.57) | 1.20 (1.07, 1.35) | 1.11 (0.88, 1.40) |
| **Multiple organ loss of tissue** |  |  |  |  |  |  |
| **Osteoporosis** |  |  |  |  |  |  |
| Never smoker | 0.89 (0.84, 0.93) | - | 0.99 (0.69, 1.43) | 1.04 (0.90, 1.20) | 0.81 (0.75, 0.87) | 0.97 (0.90, 1.05) |
| Past smoker | 1.11 (1.03, 1.20) | - | 1.02 (0.54, 1.93) | 1.01 (0.80, 1.26) | 1.18 (1.06, 1.31) | 1.09 (0.95, 1.24) |
| Current smoker | 1.08 (0.96, 1.20) |  | 1.13 (0.66, 1.94) | 1.06 (0.82, 1.36) | 1.13 (0.97, 1.33) | 1.05 (0.84, 1.30) |
| **Renal disease** |  |  |  |  |  |  |
| Never smoker | 2.62 (2.37, 2.89) | 2.88 (0.88, 9.37) | 5.40 (3.39, 8.60) | 3.47 (2.73, 4.41) | 2.08 (1.75, 2.46) | 2.77 (2.38, 3.23) |
| Past smoker | 2.08 (1.88, 2.30) | 3.23 (0.77, 13.61) | 2.55 (1.43, 4.54) | 2.63 (2.06, 3.36) | 2.21 (1.93, 2.54) | 1.56 (1.27, 1.91) |
| Current smoker | 2.29 (1.91, 2.75) | 3.22 (0.77, 13.37) | 3.71 (2.18, 6.33) | 2.68 (1.94, 3.72) | 1.93 (1.41, 2.64) | 1.94 (1.30, 2.89) |
| **Anemia** |  |  |  |  |  |  |
| Never smoker | 1.56 (1.47, 1.65) | 1.76 (0.83, 3.73) | 1.87 (1.35, 2.60) | 2.42 (2.09, 2.81) | 1.29 (1.18, 1.42) | 1.61 (1.46, 1.76) |
| Past smoker | 1.61 (1.50, 1.73) | 2 95 (1.26, 6.88) | 2.85 (2.10, 3.87) | 1.96 (1.68, 2.28) | 1.61 (1.45, 1.78) | 1.34 (1.18, 1.53) |
| Current smoker | 1.62 (1.45, 1.80) | 2.77 (1.36, 5.64) | 1.63 (1.14, 2.35) | 1.85 (1.53, 2.24) | 1.43 (1.21, 1.70) | 1.56 (1.21, 2.02) |
| **Mental cluster** |  |  |  |  |  |  |
| **Dementia** |  |  |  |  |  |  |
| Never smoker | 1.74 (1.67, 1.82) | 6.82 (0.91, 51.10) | 1.58 (0.81, 3.08) | 1.59 (1.30, 1.95) | 1.77 (1.68, 1.88) | 1.68 (1.56, 1.82) |
| Past smoker | 1.53 (1.43, 1.63) | - | 1.47 (0.65, 3.32) | 1.73 (1.40, 2.15) | 1.62 (1.47, 1.78) | 1.46 (1.32, 1.60) |
| Current smoker | 1.49 (1.33, 1.66) | 13.53 (1.81, 101.16) | 2.53 (1.50, 4.25) | 1.93 (1.51, 2.48) | 1.49 (1.27, 1.75) | 1.26 (1.03, 1.53) |
| **Depression** |  |  |  |  |  |  |
| Never smoker | 1.69 (1.54, 1.85) | - | 1.87 (0.77, 4.53) | 2.03 (1.50, 2.76) | 1.64 (1.45, 1.84) | 1.66 (1.42, 1.95) |
| Past smoker | 1.59 (1.39, 1.82) | 3.61 (0.49, 26.79) | 0.99 (0.37, 2.64) | 1.63 (1.16, 2.29) | 1.65 (1.35, 2.01) | 1.53 (1.22, 1.92) |
| Current smoker | 1.44 (1.17, 1.79) |  | 1.77 (0.84, 3.73) | 1.42 (0.90, 2.23) | 1.43 (1.04, 1.97) | 1.45 (0.94, 2.24) |

CI, confidence interval; PR, prevalence ratio

Adjusted for age, sex, residential area, income level, residential area, BMI (continuous), drinking and smoking status.
